# Supplementary material for: Structure of medical explanation: a semantic model
Source: Research Square preprint supplement (doi:10.21203/rs.3.rs-8595641/v1), 2026-02-04
Supplement: Supplementary file 1 [file 115e8dc59271dad49eb5117c.pdf]

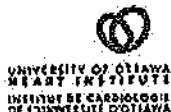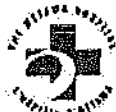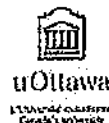

**Ottawa Hospital Research Ethics Boards / Conseils d'éthique en recherches**

725 Parkdale Avenue, Box 411, Ottawa, Ontario K1Y 4E9 613-788-6555 ext. 14902 Fax: 613-761-4311  
<http://www.ohri.ca/ohreb>

January 31, 2012

Dr. Francois Auclair  
Division of Infectious Disease  
Suite 451, Civic Parkdale Clinic  
Ottawa Hospital - Civic Campus  
737 Parkdale Ave  
Ottawa, ON K1Y 4E9

Dear Dr. Auclair:

**Re: Protocol # 2011820-01H Explanation to Patients: A Survey and Construction of a Model**

**Protocol approval valid until - March 31, 2012**

I am pleased to inform you that this protocol underwent delegated review by the Ottawa Hospital Research Ethics Board (OHREB) and is approved for two months to begin recruiting English-speaking participants. No changes, amendments or addenda may be made to the protocol or the consent forms without the OHREB's review and approval.

Approval is for the following:

- Protocol, received December 01, 2011
- English Patient Survey, received December 01, 2011
- English 'Case of Endocarditis' for Residents, received December 01, 2011
- English Information Sheet and Consent Form (Patient), version dated January 23, 2012
- English Information Sheet and Consent Form (Resident), version dated January 23, 2012

The validation date should be indicated on the bottom of all consent forms and information sheets (see copy attached).

Upon receipt of the French Survey, Case and two Consent Forms, ethical approval will be extended to January 30, 2013 and the recruitment of French-speaking participants may begin.

The Ottawa Hospital Research Ethics Board is constituted in accordance with, and operates in compliance with the requirements of the Tri-Council Policy Statement: Ethical Conduct for Research Involving Humans; Health Canada Good Clinical Practice: Consolidated Guideline; Part C Division 5 of the Food and Drug Regulations of Health Canada; and the provisions of the Ontario Health Information Protection Act 2004 and its applicable Regulations.

Yours sincerely,

Raphael Saginur, M.D.  
Chairman  
Ottawa Hospital Research Ethics Board

/hm

encl.

*e-mail  
notification*
